# Supplementary material
Source: PubMed Central journal article supplement (PMC2453687)
Supplement: NIHMS47674-supplement-Tables_S1_and.pdf [file NIHMS47674-supplement-Tables_S1_and.pdf]

## Supplementary tables

Table S1. List of genes inactivated in *M. pulmonis*<sup>a</sup>

| Gene      | Product                                               | Gene symbol | Gene length (bp) | Mg ortholog | Essential in Mg | Essential in Bs |
|-----------|-------------------------------------------------------|-------------|------------------|-------------|-----------------|-----------------|
| MYPY_0030 | Conserved hypothetical protein                        |             | 222              | NA          | NA              | no              |
| MYPY_0040 | Conserved hypothetical protein                        |             | 684              | MG356       | yes             | no              |
| MYPY_0140 | TatD-related Dnase                                    |             | 759              | MG009       | no              | no              |
| MYPY_0160 | Hypothetical protein                                  |             | 360              | NA          | NA              | NA              |
| MYPY_0170 | PTS system, glucose-specific IIABC component          | ptsG        | 2376             | MG069       | yes             | no              |
| MYPY_0180 | IS1138 transposase                                    |             | 1209             | NA          | NA              | NA              |
| MYPY_0190 | Lipoprotein                                           |             | 2301             | NA          | NA              | NA              |
| MYPY_0200 | Hypothetical protein                                  |             | 360              | NA          | NA              | NA              |
| MYPY_0210 | Dihydrolipoamide dehydrogenase                        | pdhD        | 1368             | MG271       | no              | no              |
| MYPY_0220 | MGPA-like ( <i>Mycoplasma genitalium</i> ) protein    |             | 975              | MG190       | yes             | no              |
| MYPY_0320 | Lipoate-protein ligase A                              | lplA        | 1038             | MG270       | yes             | no              |
| MYPY_0330 | Esterase/lipase 2                                     |             | 873              | MG327       | yes             | no              |
| MYPY_0350 | Esterase/lipase 1                                     |             | 807              | MG310       | yes             | no              |
| MYPY_0360 | Esterase/lipase 1                                     |             | 822              | MG310       | yes             | no              |
| MYPY_0370 | Esterase/lipase 1                                     |             | 822              | MG310       | yes             | no              |
| MYPY_0380 | Esterase/lipase 1                                     |             | 804              | MG310       | yes             | no              |
| MYPY_0390 | ABC transporter ATP-binding protein                   |             | 1626             | MG014       | yes             | no              |
| MYPY_0400 | ABC transporter permease protein (MDR homolog)        |             | 720              | NA          | NA              | NA              |
| MYPY_0410 | ABC transporter ATP-binding protein                   |             | 840              | MG015       | yes             | no              |
| MYPY_0420 | Hypothetical protein                                  |             | 1227             | NA          | NA              | NA              |
| MYPY_0430 | CpG DNA methyltransferase (cytosine-specific)         |             | NA               | NA          | NA              |                 |
| MYPY_0550 | 5'-nucleosidase precursor                             |             | 1698             | NA          | NA              | no              |
| MYPY_0560 | Lipoprotein                                           |             | 423              | NA          | NA              | NA              |
| MYPY_0570 | Lipoprotein                                           |             | 1185             | NA          | NA              | NA              |
| MYPY_0580 | Hypothetical protein                                  |             | 1209             | NA          | NA              | NA              |
| MYPY_0590 | Hypothetical protein                                  |             | 900              | NA          | NA              | NA              |
| MYPY_0600 | Hypothetical protein                                  |             | 921              | NA          | NA              | NA              |
| MYPY_0610 | Hypothetical protein                                  |             | 426              | NA          | NA              | NA              |
| MYPY_0630 | Hypothetical protein                                  |             | 552              | NA          | NA              | NA              |
| MYPY_0640 | ABC transporter ATP-binding protein                   |             | 498              | MG467       | yes             | no              |
| MYPY_0650 | ABC transporter permease protein                      |             | 1425             | NA          | NA              | NA              |
| MYPY_0660 | ABC transporter ATP-binding protein                   |             | 2280             | MG467       | yes             | no              |
| MYPY_0670 | Lipoprotein                                           |             | 801              | NA          | NA              | NA              |
| MYPY_0680 | Hypothetical protein                                  |             | 930              | NA          | NA              | NA              |
| MYPY_0690 | ATP-dependent RNA helicase                            | deaD        | 1443             | MG425       | yes             | no              |
| MYPY_0700 | Hypothetical protein                                  |             | 207              | NA          | NA              | NA              |
| MYPY_0710 | Hypothetical protein                                  |             | 186              | NA          | NA              | NA              |
| MYPY_0720 | Hypothetical protein                                  |             | 168              | NA          | NA              | NA              |
| MYPY_0740 | Hypothetical protein                                  |             | 243              | NA          | NA              | NA              |
| MYPY_0780 | Restriction-modification enzyme subunit R3 (fragment) | hsdR        | 1140             | NA          | NA              | NA              |
| MYPY_0800 | Hypothetical protein                                  |             | 276              | NA          | NA              | NA              |
| MYPY_0820 | Restriction-modification enzyme subunit M3 (fragment) | hsdM        | 999              | NA          | NA              | NA              |
| MYPY_0830 | Restriction-modification enzyme subunit               | hsdS        | 1080             | NA          | NA              | NA              |

| S3A        |                                                            |      |      |       |     |     |
|------------|------------------------------------------------------------|------|------|-------|-----|-----|
|            | Restriction-modification enzyme subunit S3B                | hsdS | 1047 | NA    | NA  | NA  |
| MYPUP_0840 | Hypothetical protein                                       |      | 492  | NA    | NA  | NA  |
| MYPUP_0850 | Recombination protein RecU                                 | recU | 474  | MG352 | no  | no  |
| MYPUP_0860 | Lipoprotein                                                |      | 1815 | NA    | NA  | NA  |
| MYPUP_0920 | Hypothetical protein                                       |      | 1134 | NA    | NA  | NA  |
| MYPUP_0940 | O6-methylguanine-DNA methyltransferase                     | ogt  | 1137 | NA    | NA  | no  |
| MYPUP_0950 | Excinuclease ABC subunit B                                 | uvrB | 1974 | MG073 | yes | no  |
| MYPUP_0960 | Pantetheine-phosphate adenylyltransferase                  | coaD | 450  | NA    | NA  | no  |
| MYPUP_0970 | Multiple sugar ABC transporter protein, lipoprotein        | msmE | 1455 | NA    | NA  | NA  |
| MYPUP_0980 | Multiple sugar ABC transporter ATP-binding protein         | msmK | 1761 | MG187 | yes | no  |
| MYPUP_0990 | Multiple sugar ABC transporter permease protein            | msmF | 852  | MG188 | yes | no  |
| MYPUP_1010 | ABC transporter ATP-binding protein                        |      | 654  | MG290 | no  | no  |
| MYPUP_1070 | P69-like ( <i>Mycoplasma hyorhinitis</i> ) ABC transporter |      | 1707 | MG291 | no  | no  |
| MYPUP_1080 | ABC transporter permease protein                           |      | 1101 | NA    | NA  | NA  |
| MYPUP_1090 | Hypothetical protein                                       |      | 708  | NA    | NA  | NA  |
| MYPUP_1110 | Conserved hypothetical protein                             |      | 915  | NA    | NA  | NA  |
| MYPUP_1120 | Ribosomal large subunit pseudouridine synthase C           | rluC | 849  | MG209 | yes | no  |
| MYPUP_1170 | Hypothetical protein                                       |      | 738  | NA    | NA  | NA  |
| MYPUP_1210 | Helicase                                                   |      | 3084 | MG140 | no  | no  |
| MYPUP_1220 | Hypothetical protein                                       |      | 1644 | NA    | NA  | NA  |
| MYPUP_1250 | Hypothetical protein                                       |      | 654  | NA    | NA  | NA  |
| MYPUP_1260 | Methyltransferase protein GidB                             | gidB | 684  | MG380 | no  | no  |
| MYPUP_1280 | PTS system, fructose-specific IIBC component               | fruA | 2097 | MG062 | no  | no  |
| MYPUP_1290 | Hypothetical protein                                       |      | 1152 | NA    | NA  | NA  |
| MYPUP_1320 | Hypothetical protein                                       |      | 387  | NA    | NA  | NA  |
| MYPUP_1350 | Nuclease, lipoprotein                                      |      | 573  | NA    | NA  | NA  |
| MYPUP_1390 | Thymidine kinase                                           | tdk  | 573  | MG034 | yes | no  |
| MYPUP_1450 | Hypothetical protein                                       |      | 984  | NA    | NA  | NA  |
| MYPUP_1480 | IS1138 transposase, truncated                              |      | 237  | NA    | NA  | NA  |
| MYPUP_1510 | Excinuclease ABC subunit C                                 | uvrC | 1692 | MG206 | yes | no  |
| MYPUP_1560 | Recombinational DNA repair protein O                       | recO | 687  | NA    | NA  | no  |
| MYPUP_1590 | Hypothetical protein                                       |      | 360  | NA    | NA  | NA  |
| MYPUP_1600 | Ribonuclease III (RNase III)                               | rnc  | 726  | MG367 | no  | yes |
| MYPUP_1630 | Hypothetical protein                                       |      | 159  | NA    | NA  | NA  |
| MYPUP_1640 | tRNA (guanine-N(7)-)-methyltransferase                     | trmB | 612  | MG347 | yes | no  |
| MYPUP_1660 | 23S rRNA methylase, hemolysin-like                         | ftsJ | 717  | NA    | NA  | no  |
| MYPUP_1710 | Cysteine desulfurase                                       | csd  | 1182 | MG336 | yes | yes |
| MYPUP_1720 | Hypothetical protein                                       |      | 216  | NA    | NA  | NA  |
| MYPUP_1750 | CpG DNA methylase                                          |      | 795  | NA    | NA  | NA  |
| MYPUP_1860 | Conserved hypothetical protein                             |      | 2892 | NA    | NA  | NA  |
| MYPUP_1870 | Hypothetical protein                                       |      | 390  | NA    | NA  | NA  |
| MYPUP_1890 | Hypothetical protein                                       |      | 471  | NA    | NA  | NA  |
| MYPUP_1910 | Hypothetical protein                                       |      | 504  | NA    | NA  | NA  |
| MYPUP_1920 | Lipoprotein                                                |      | 972  | NA    | NA  | NA  |
| MYPUP_1930 | Lipoprotein                                                |      | 843  | NA    | NA  | NA  |

|           |                                                             |      |      |       |     |    |
|-----------|-------------------------------------------------------------|------|------|-------|-----|----|
| MYPU_1950 | Lipoprotein                                                 |      | 963  | NA    | NA  | NA |
| MYPU_1960 | ABC-type multidrug transport system, ATPase component       |      | 708  | NA    | NA  | no |
| MYPU_1970 | Hypothetical protein                                        |      | 1821 | NA    | NA  | NA |
| MYPU_1980 | Ascorbate-specific PTS system enzyme IIC                    | sgaT | 1956 | NA    | NA  | NA |
| MYPU_2020 | Conserved membrane protein, possible ribonuclease BN family |      | 1059 | NA    | NA  | NA |
| MYPU_2060 | Lipoprotein                                                 |      | 2322 | NA    | NA  | NA |
| MYPU_2070 | Lipoprotein                                                 |      | 1704 | NA    | NA  | NA |
| MYPU_2080 | Hypothetical protein                                        |      | 153  | NA    | NA  | NA |
| MYPU_2090 | Trigger factor                                              | tig  | 1380 | MG238 | no  | no |
| MYPU_2110 | Conserved hypothetical protein                              |      | 9651 | NA    | NA  | NA |
| MYPU_2120 | Conserved hypothetical protein                              |      | 4134 | NA    | NA  | NA |
| MYPU_2130 | Conserved hypothetical protein                              |      | 4887 | NA    | NA  | NA |
| MYPU_2140 | Conserved hypothetical protein                              |      | 3810 | NA    | NA  | NA |
| MYPU_2160 | Hypothetical protein                                        |      | 3387 | NA    | NA  | NA |
| MYPU_2180 | Phosphonate ABC transporter, permease protein (P69)         |      | 1746 | MG291 | no  | no |
| MYPU_2210 | Glycerol kinase                                             | glpK | 1524 | MG038 | yes | no |
| MYPU_2260 | Conserved hypothetical protein                              |      | 864  | MG103 | no  | no |
| MYPU_2290 | Hypothetical protein                                        |      | 1524 | NA    | NA  | NA |
| MYPU_2360 | ATP synthase subunit B                                      | atpD | 2097 | MG399 | yes | no |
| MYPU_2420 | Hypothetical protein                                        |      | 735  | NA    | NA  | NA |
| MYPU_2450 | Lipoprotein                                                 |      | 2757 | NA    | NA  | NA |
| MYPU_2470 | Translation factor LepA                                     | lepA | 1836 | MG138 | no  | no |
| MYPU_2490 | Hypothetical protein                                        |      | 165  | NA    | NA  | NA |
| MYPU_2500 | Hypothetical protein                                        |      | 1371 | NA    | NA  | NA |
| MYPU_2520 | DNA recombinase A                                           | recA | 1020 | MG339 | no  | no |
| MYPU_2540 | Conserved hypothetical protein                              |      | 459  | NA    | NA  | NA |
| MYPU_2620 | Conserved hypothetical protein                              |      | 1404 | MG294 | no  | no |
| MYPU_2630 | Glycerophosphoryl diester phosphodiesterase                 | glpQ | 723  | MG293 | no  | no |
| MYPU_2640 | Glycerol-3-phosphate dehydrogenase                          | glpD | 1155 | MG039 | no  | no |
| MYPU_2750 | Hypothetical protein                                        |      | 288  | NA    | NA  | NA |
| MYPU_2760 | Conserved hypothetical protein                              |      | 363  | NA    | NA  | no |
| MYPU_2790 | Hypothetical protein                                        |      | 3300 | NA    | NA  | NA |
| MYPU_2800 | Hypothetical protein                                        |      | 414  | NA    | NA  | NA |
| MYPU_2810 | Xanthine/uracil permease family protein                     |      | 1509 | NA    | NA  | no |
| MYPU_2860 | Oligopeptide ABC transporter ATP-binding protein            | oppF | 2346 | MG080 | yes | no |
| MYPU_2880 | Conserved lipoprotein                                       |      | 2358 | MG395 | yes | no |
| MYPU_2970 | Amino acid permease                                         | aapA | 1566 | MG225 | yes | no |
| MYPU_2990 | Hypothetical protein                                        |      | 924  | NA    | NA  | NA |
| MYPU_3040 | SpoU rRNA methylase family                                  |      | 753  | MG252 | no  | no |
| MYPU_3070 | Heat shock protein HSP33                                    |      | 870  | NA    | NA  | no |
| MYPU_3080 | Conserved hypothetical protein                              |      | 3054 | NA    | NA  | NA |
| MYPU_3160 | Lipoprotein                                                 |      | 1896 | NA    | NA  | NA |
| MYPU_3170 | Hypothetical protein                                        |      | 156  | NA    | NA  | NA |
| MYPU_3180 | Lipoprotein                                                 |      | 1908 | NA    | NA  | NA |
| MYPU_3190 | Lipoprotein                                                 |      | 1929 | NA    | NA  | NA |
| MYPU_3200 | Lipoprotein                                                 |      | 1854 | NA    | NA  | NA |
| MYPU_3210 | Oligoendopeptidase F                                        | pepF | 1842 | MG183 | no  | no |

|            |                                                      |                |      |       |     |     |
|------------|------------------------------------------------------|----------------|------|-------|-----|-----|
| MYPYU_3250 | Conserved protein                                    |                | 747  | NA    | NA  | NA  |
| MYPYU_3260 | Conserved hypothetical metal-dependent hydrolase     |                | 534  | NA    | NA  | NA  |
| MYPYU_3340 | Hypothetical protein                                 |                | 831  | NA    | NA  | NA  |
| MYPYU_3380 | Lipoprotein                                          |                | 1851 | NA    | NA  | NA  |
| MYPYU_3400 | Hypothetical protein                                 |                | 150  | NA    | NA  | NA  |
| MYPYU_3410 | Hypothetical protein                                 |                | 1710 | NA    | NA  | NA  |
| MYPYU_3430 | Xylose ABC transporter, substrate-binding protein    | xylF           | 1383 | NA    | NA  | NA  |
| MYPYU_3440 | Xylose ABC transporter ATP-binding protein           | xylG           | 1581 | NA    | NA  | NA  |
| MYPYU_3450 | Xylose ABC transporter permease protein              | xylH           | 1917 | NA    | NA  | NA  |
| MYPYU_3460 | ABC transporter xylose-binding lipoprotein           | xylF           | 1386 | NA    | NA  | NA  |
| MYPYU_3490 | Hypothetical protein                                 |                | 714  | NA    | NA  | NA  |
| MYPYU_3510 | Ribonuclease R                                       | vacB           | 2178 | MG104 | yes | no  |
| MYPYU_3550 | Conserved hypothetical protein                       |                | 354  | NA    | NA  | NA  |
| MYPYU_3560 | Hypothetical protein                                 |                | 1134 | NA    | NA  | NA  |
| MYPYU_3570 | Conserved hypothetical protein                       |                | 441  | NA    | NA  | NA  |
| MYPYU_3600 | Fructose-biphosphate aldolase                        | fba            | 843  | MG023 | yes | yes |
| MYPYU_3620 | Glucosamine-6-phosphate isomerase                    | nagB<br>(gamA) | 771  | NA    | NA  | no  |
| MYPYU_3660 | Hypothetical protein                                 |                | 345  | NA    | NA  | NA  |
| MYPYU_3670 | Hypothetical protein                                 |                | 411  | NA    | NA  | NA  |
| MYPYU_3680 | Hypothetical protein                                 |                | 411  | NA    | NA  | no  |
| MYPYU_3690 | N-acetylglucosamine-6-phosphate deacetylase          | nagA           | 762  | NA    | NA  | no  |
| MYPYU_3700 | Hypothetical protein                                 |                | 879  | NA    | NA  | NA  |
| MYPYU_3710 | Lipoprotein                                          |                | 1107 | NA    | NA  | no  |
| MYPYU_3750 | Leucyl aminopeptidase                                | pepA           | 1380 | MG391 | yes | no  |
| MYPYU_3760 | ABC transporter ATP-binding and permease protein     |                | 2043 | MG390 | no  | no  |
| MYPYU_3790 | Cytidine deaminase                                   | cdd            | 339  | MG052 | yes | no  |
| MYPYU_3820 | Conserved hypothetical protein                       |                | 3552 | NA    | NA  | no  |
| MYPYU_3830 | TrsE transfer complex protein                        | trsE           | 2562 | NA    | NA  | NA  |
| MYPYU_3840 | Hypothetical membrane protein                        |                | 1113 | NA    | NA  | NA  |
| MYPYU_3900 | Lysyl-tRNA synthetase                                | lysS           | 1533 | MG136 | yes | yes |
| MYPYU_3920 | IS3 transposase, amino half                          |                | 561  | NA    | NA  | NA  |
| MYPYU_3930 | Conserved hypothetical protein                       |                | 2274 | NA    | NA  | NA  |
| MYPYU_3940 | IS1138 transposase                                   |                | 1209 | NA    | NA  | NA  |
| MYPYU_3950 | Type III restriction-modification system nuclease    |                | 2694 | NA    | NA  | NA  |
| MYPYU_3970 | Type III restriction-modification system methylase   |                | 1698 | NA    | NA  | NA  |
| MYPYU_3980 | Type III restriction-modification system methylase   |                | 1959 | NA    | NA  | NA  |
| MYPYU_3990 | IS3 transposase, carboxy half                        |                | 441  | NA    | NA  | NA  |
| MYPYU_4000 | IS3 transposase, amino half                          |                | 561  | NA    | NA  | NA  |
| MYPYU_4020 | Lysyl-tRNA synthetase                                | lysS           | 1476 | MG136 | yes | yes |
| MYPYU_4040 | Hypothetical protein                                 |                | 786  | NA    | NA  | NA  |
| MYPYU_4110 | Oligopeptide ABC transporter system permease protein | oppC           | 963  | NA    | NA  | no  |
| MYPYU_4120 | Oligopeptide ABC transporter ATP-binding protein     | oppD           | 1464 | NA    | NA  | no  |
| MYPYU_4130 | Oligopeptide ABC transporter ATP-binding protein     | oppF           | 1323 | NA    | NA  | no  |
| MYPYU_4140 | Conserved hypothetical protein                       |                | 6735 | NA    | NA  | NA  |
| MYPYU_4150 | Lipoprotein                                          |                | 2715 | NA    | NA  | NA  |

|            |                                                                     |      |      |       |     |     |
|------------|---------------------------------------------------------------------|------|------|-------|-----|-----|
| MYPYU_4160 | Hypothetical protein                                                |      | 1419 | NA    | NA  | NA  |
| MYPYU_4180 | Hypothetical protein                                                |      | 1020 | NA    | NA  | NA  |
| MYPYU_4200 | Hypothetical protein                                                |      | 1737 | NA    | NA  | NA  |
| MYPYU_4310 | Restriction-modification enzyme subunit S2A                         | hsdS | 1188 | NA    | NA  | NA  |
| MYPYU_4320 | Restriction-modification enzyme subunit R2                          | hsdR | 2961 | NA    | NA  | NA  |
| MYPYU_4330 | Restriction-modification enzyme subunit M2                          | hsdM | 1563 | NA    | NA  | NA  |
| MYPYU_4340 | Restriction-modification enzyme subunit S2B                         | hsdS | 1011 | NA    | NA  | NA  |
| MYPYU_4350 | Hypothetical protein                                                |      | 807  | NA    | NA  | NA  |
| MYPYU_4360 | Lipoprotein                                                         |      | 543  | NA    | NA  | NA  |
| MYPYU_4370 | Hypothetical protein                                                |      | 2376 | NA    | NA  | NA  |
| MYPYU_4380 | Conserved hypothetical protein                                      |      | 2379 | NA    | NA  | NA  |
| MYPYU_4390 | Hypothetical protein                                                |      | 2001 | NA    | NA  | NA  |
| MYPYU_4400 | Oxygenase                                                           |      | 1044 | NA    | NA  | no  |
| MYPYU_4410 | Glycine cleavage system H protein                                   | gcdh | 336  | NA    | NA  | no  |
| MYPYU_4430 | Lipoate-protein ligase A                                            |      | 1035 | NA    | NA  | NA  |
| MYPYU_4460 | Hypothetical protein                                                |      | 825  | NA    | NA  | NA  |
| MYPYU_4480 | Hypothetical protein                                                |      | 2739 | NA    | NA  | NA  |
| MYPYU_4500 | ATP synthase subunit B                                              | atpD | 1407 | MG399 | yes | no  |
| MYPYU_4550 | Lipoprotein                                                         |      | 585  | NA    | NA  | NA  |
| MYPYU_4560 | Conserved hypothetical protein                                      |      | 753  | NA    | NA  | NA  |
| MYPYU_4600 | Conserved hypothetical protein                                      |      | 543  | NA    | NA  | NA  |
| MYPYU_4610 | Conserved hypothetical protein                                      |      | 1272 | NA    | NA  | NA  |
| MYPYU_4630 | Glucan 1,6-alpha-glucosidase                                        | dexB | 1587 | NA    | NA  | no  |
| MYPYU_4640 | RmuC domain protein                                                 | rmuC | 1353 | NA    | NA  | NA  |
| MYPYU_4650 | Lipoprotein                                                         |      | 1869 | NA    | NA  | NA  |
| MYPYU_4660 | Hypothetical protein                                                |      | 1488 | NA    | NA  | NA  |
| MYPYU_4730 | Putative transcriptional regulator, homolog of Bvg accessory factor |      | 675  | NA    | NA  | NA  |
| MYPYU_4750 | Conserved hypothetical protein                                      |      | 561  | MG029 | yes | no  |
| MYPYU_4780 | Lipoprotein                                                         |      | 2253 | NA    | NA  | NA  |
| MYPYU_4790 | Conserved hypothetical protein                                      |      | 2415 | NA    | NA  | NA  |
| MYPYU_4800 | Type III restriction-modification system methylase                  |      | 1764 | NA    | NA  | NA  |
| MYPYU_4820 | Lipoprotein                                                         |      | 2274 | NA    | NA  | NA  |
| MYPYU_4870 | Lipoprotein                                                         |      | 1458 | NA    | NA  | NA  |
| MYPYU_4890 | Ribosomal protein L33                                               | rpmG | 153  | MG325 | yes | yes |
| MYPYU_4970 | ABC transporter ATP-binding protein                                 |      | 1536 | MG187 | yes | no  |
| MYPYU_4980 | ABC transporter permease protein                                    |      | 1011 | MG188 | yes | no  |
| MYPYU_4990 | ABC transporter permease protein                                    |      | 834  | MG189 | yes | no  |
| MYPYU_5000 | Conserved hypothetical membrane protein                             |      | 2211 | NA    | NA  | NA  |
| MYPYU_5030 | Conserved hypothetical protein                                      |      | 1479 | NA    | NA  | NA  |
| MYPYU_5040 | Conserved hypothetical lipoprotein                                  |      | 2406 | NA    | NA  | NA  |
| MYPYU_5050 | Conserved hypothetical protein                                      |      | 2502 | NA    | NA  | NA  |
| MYPYU_5070 | Conserved hypothetical protein                                      |      | 1434 | NA    | NA  | NA  |
| MYPYU_5080 | Lipoprotein                                                         |      | 2043 | NA    | NA  | NA  |
| MYPYU_5090 | Lipoprotein                                                         |      | 1863 | NA    | NA  | NA  |
| MYPYU_5200 | Lipoprotein D                                                       |      | 999  | NA    | NA  | NA  |
| MYPYU_5210 | Hypothetical protein                                                |      | 1410 | NA    | NA  | NA  |
| MYPYU_5220 | Lipoprotein B                                                       |      | 711  | NA    | NA  | NA  |

|            |                                                             |      |      |       |     |     |
|------------|-------------------------------------------------------------|------|------|-------|-----|-----|
| MYPYU_5230 | Lipoprotein VsaA (fragment)                                 |      | 846  | NA    | NA  | NA  |
| MYPYU_5260 | Lipoprotein VsaE (fragment)                                 |      | 945  | NA    | NA  | NA  |
| MYPYU_5300 | Lipoprotein A                                               |      | 1737 | NA    | NA  | NA  |
| MYPYU_5310 | Site-specific DNA recombinase                               | hvsR | 825  | NA    | NA  | NA  |
| MYPYU_5340 | Hypothetical protein                                        |      | 492  | NA    | NA  | NA  |
| MYPYU_5350 | Hypothetical protein                                        |      | 900  | NA    | NA  | NA  |
| MYPYU_5360 | TatD-related DNase                                          |      | 1308 | MG009 | no  | no  |
| MYPYU_5380 | Thymidylate synthase                                        | thyA | 861  | MG227 | no  | no  |
| MYPYU_5390 | Ribonucleotide-diphosphate reductase beta subunit           | nrdF | 1026 | MG229 | yes | yes |
| MYPYU_5410 | Ribonucleotide-diphosphate reductase alpha subunit          | nrdE | 2136 | MG231 | yes | yes |
| MYPYU_5440 | Conserved hypothetical protein, hydrolase                   |      | 858  | MG265 | yes | no  |
| MYPYU_5520 | Deoxyguanosine kinase                                       | dgk  | 651  | MG268 | no  | no  |
| MYPYU_5590 | Hypothetical protein                                        |      | 3687 | NA    | NA  | NA  |
| MYPYU_5910 | Conserved hypothetical protein                              |      | 888  | NA    | NA  | NA  |
| MYPYU_5920 | Hypothetical protein                                        |      | 198  | NA    | NA  | NA  |
| MYPYU_5930 | Phosphotriesterase                                          |      | 1056 | NA    | NA  | NA  |
| MYPYU_5940 | Ascorbate-specific PTS system enzyme IIC                    | sgaT | 1785 | NA    | NA  | NA  |
| MYPYU_5970 | Hexulose-6-phosphate synthase                               | sgaH | 699  | NA    | NA  | NA  |
| MYPYU_5980 | Hexulose-6-phosphate isomerase                              | sgaU | 918  | NA    | NA  | NA  |
| MYPYU_6000 | High-affinity ribose transport protein                      | rbsD | 402  | NA    | NA  | NA  |
| MYPYU_6040 | Lipoprotein                                                 |      | 1482 | NA    | NA  | NA  |
| MYPYU_6050 | Lipoprotein                                                 |      | 504  | NA    | NA  | NA  |
| MYPYU_6060 | Lipoprotein                                                 |      | 1923 | NA    | NA  | NA  |
| MYPYU_6070 | Lipoprotein                                                 |      | 2370 | NA    | NA  | NA  |
| MYPYU_6080 | Hypothetical protein, possible oligopeptide ABC transporter |      | 1110 | NA    | NA  | NA  |
| MYPYU_6090 | Ribosomal protein S18                                       | rpsR | 318  | MG092 | yes | yes |
| MYPYU_6150 | Uracil-DNA glycosylase                                      | ung  | 666  | MG097 | yes | no  |
| MYPYU_6180 | Sugar ABC transporter permease protein                      |      | 1797 | MG120 | yes | no  |
| MYPYU_6190 | Sugar ABC transporter ATP-binding protein                   | mgIA | 1560 | MG119 | yes | no  |
| MYPYU_6200 | Hypothetical protein                                        |      | 960  | NA    | NA  | NA  |
| MYPYU_6220 | Conserved hypothetical protein, transcriptional regulator   |      | 948  | NA    | NA  | NA  |
| MYPYU_6240 | Conserved hypothetical protein                              |      | 726  | MG332 | yes | no  |
| MYPYU_6250 | ABC transporter ATP-binding and permease protein            |      | 2253 | MG467 | yes | no  |
| MYPYU_6260 | ABC transporter ATP-binding and permease protein            |      | 1923 | MG065 | yes | no  |
| MYPYU_6270 | Hypothetical protein                                        |      | 1041 | NA    | NA  | NA  |
| MYPYU_6280 | Hypothetical protein                                        |      | 714  | NA    | NA  | NA  |
| MYPYU_6310 | Hypothetical protein                                        |      | 156  | NA    | NA  | NA  |
| MYPYU_6320 | Alpha-amylase 3                                             | amyA | 1824 | NA    | NA  | NA  |
| MYPYU_6340 | Trehalose/maltose hydrolase (possible phosphorylase)        |      | 2334 | NA    | NA  | NA  |
| MYPYU_6350 | Beta-phosphoglucomutase                                     | pgmB | 678  | NA    | NA  | NA  |
| MYPYU_6370 | Lipoprotein                                                 |      | 2331 | NA    | NA  | NA  |
| MYPYU_6390 | Maltodextrin ABC transporter permease protein               | malC | 3105 | NA    | NA  | NA  |
| MYPYU_6400 | Maltodextrin ABC transporter permease protein               | malD | 945  | NA    | NA  | NA  |
| MYPYU_6410 | Maltodextrin ABC transporter ATP-binding protein            | malK | 1179 | NA    | NA  | NA  |
| MYPYU_6440 | Pullulanase precursor                                       | pulA | 2076 | NA    | NA  | NA  |
| MYPYU_6460 | Thymidine phosphorylase                                     | deoA | 1293 | MG051 | no  | no  |

|            |                                                                                    |               |      |       |     |     |
|------------|------------------------------------------------------------------------------------|---------------|------|-------|-----|-----|
| MYPYU_6470 | Hypothetical protein                                                               |               | 2631 | NA    | NA  | NA  |
| MYPYU_6480 | Hypothetical protein                                                               |               | 852  | NA    | NA  | NA  |
| MYPYU_6500 | Hypothetical protein                                                               |               | 3669 | NA    | NA  | NA  |
| MYPYU_6510 | Hypothetical protein                                                               |               | 3819 | NA    | NA  | NA  |
| MYPYU_6520 | Lipoprotein                                                                        |               | 627  | NA    | NA  | NA  |
| MYPYU_6540 | Lipoprotein                                                                        |               | 630  | NA    | NA  | NA  |
| MYPYU_6550 | Subtilisin, serine protease                                                        |               | 1662 | NA    | NA  | NA  |
| MYPYU_6570 | Holliday junction DNA helicase motor protein                                       | ruvA          | 594  | MG358 | no  | no  |
| MYPYU_6580 | Holliday junction DNA helicase RuvB                                                | ruvB          | 948  | MG359 | no  | no  |
| MYPYU_6610 | Amino acid permease                                                                |               | 1527 | NA    | NA  | no  |
| MYPYU_6620 | Phosphoesterase, putative                                                          |               | 705  | NA    | NA  | NA  |
| MYPYU_6630 | Hypothetical protein                                                               |               | 1668 | NA    | NA  | NA  |
| MYPYU_6760 | Restriction-modification enzyme subunit S1A                                        | hsdS          | 1107 | NA    | NA  | NA  |
| MYPYU_6770 | Restriction-modification enzyme subunit R1                                         | hsdR          | 2961 | NA    | NA  | NA  |
| MYPYU_6780 | Restriction-modification enzyme subunit M1                                         | hsdM          | 1563 | NA    | NA  | NA  |
| MYPYU_6790 | Restriction-modification enzyme subunit S1B                                        | hsdS          | 1110 | NA    | NA  | NA  |
| MYPYU_6840 | GTPase                                                                             |               | 819  | MG110 | no  | Yes |
| MYPYU_6880 | N6-adenine-specific methylase                                                      |               | 549  | NA    | NA  | no  |
| MYPYU_6910 | Hypothetical protein                                                               |               | 1044 | NA    | NA  | NA  |
| MYPYU_6930 | Membrane nuclease, lipoprotein                                                     | mnuA          | 3378 | NA    | NA  | NA  |
| MYPYU_6940 | Membrane nuclease                                                                  |               | 1185 | NA    | NA  | NA  |
| MYPYU_6960 | Ribosomal protein L28                                                              | rpmB          | 192  | MG426 | yes | yes |
| MYPYU_6980 | ATP-dependent helicase PcrA                                                        | pcrA,<br>uvrD | 2205 | MG244 | no  | yes |
| MYPYU_7000 | ATP synthase subunit A                                                             | atpA          | 1530 | MG401 | yes | no  |
| MYPYU_7010 | Conserved hypothetical protein                                                     |               | 645  | NA    | NA  | NA  |
| MYPYU_7030 | Hypothetical protein                                                               |               | 2259 | NA    | NA  | NA  |
| MYPYU_7060 | Conserved hypothetical protein                                                     |               | 1038 | NA    | NA  | NA  |
| MYPYU_7100 | Excinuclease ABC subunit A                                                         | uvrA          | 2835 | MG421 | yes | no  |
| MYPYU_7210 | Dephospho-coenzyme A kinase                                                        | coaE          | 519  | MG264 | no  | yes |
| MYPYU_7250 | Mannose-6-phosphate isomerase                                                      | pmi           | 912  | NA    | NA  | NA  |
| MYPYU_7290 | Possibly related to phosphopentomutase                                             |               | 708  | NA    | NA  | NA  |
| MYPYU_7300 | Aminopeptidase                                                                     |               | 1104 | NA    | NA  | NA  |
| MYPYU_7310 | Hypothetical protein                                                               |               | 1086 | NA    | NA  | NA  |
| MYPYU_7340 | Lipoprotein                                                                        |               | 2049 | NA    | NA  | NA  |
| MYPYU_7350 | Lipoprotein                                                                        |               | 4641 | NA    | NA  | NA  |
| MYPYU_7370 | Hypothetical protein                                                               |               | 2976 | NA    | NA  | NA  |
| MYPYU_7410 | ABC-type multidrug transport system, ATPase and permease components                |               | 1629 | NA    | NA  | NA  |
| MYPYU_7420 | ABC-type multidrug transport system, ATPase and permease components                |               | 1617 | NA    | NA  | NA  |
| MYPYU_7470 | Hypothetical protein                                                               |               | 405  | NA    | NA  | NA  |
| MYPYU_7480 | Hexosephosphate transport protein                                                  | uphT          | 1428 | MG061 | no  | no  |
| MYPYU_7500 | Mannitol-1-phosphate 5-dehydrogenase PTS system, mannitol-specific IIABC component | mtlD          | 1083 | NA    | NA  | NA  |
| MYPYU_7510 | component                                                                          | mtlA          | 1029 | NA    | NA  | NA  |
| MYPYU_7540 | Hypothetical protein                                                               |               | 732  | NA    | NA  | NA  |
| MYPYU_7560 | IS1138 transposase                                                                 |               | 1209 | NA    | NA  | NA  |
| MYPYU_7630 | Pyruvate dehydrogenase E1 component,                                               | pdhB          | 999  | MG273 | yes | no  |

| beta subunit |                                      |      |      |    |    |    |
|--------------|--------------------------------------|------|------|----|----|----|
| MYPU_7720    | NADH-dependent flavin oxidoreductase | baiH | 1197 | NA | NA | no |
| MYPU_7750    | Carnitine O-acetyltransferase        | cat  | 1806 | NA | NA | NA |
| MYPU_7760    | Hypothetical protein                 |      | 1614 | NA | NA | NA |
| MYPU_7770    | Hypothetical protein                 |      | 228  | NA | NA | NA |

---

<sup>a</sup>Essential genes in *M. genitalium* (Mg) and *B. subtilis* (Bs) are as reported by Glass et al. and Kobayashi et al. (Glass *et al.*, 2006; Kobayashi *et al.*, 2003).



Table S2. List of essential genes (putative) in *M. pulmonis*<sup>a</sup>

| Gene      | Product                                                               | Gene symbol | Gene length (bp) | Mg ortholog | Essential in Mg | Essential in Bs |
|-----------|-----------------------------------------------------------------------|-------------|------------------|-------------|-----------------|-----------------|
| MYPU_0010 | Chromosomal replication initiator protein DnaA                        | dnaA        | 1386             | MG469       | Yes             | Yes             |
| MYPU_0020 | DNA polymerase III, beta chain                                        | dnaN        | 1122             | MG001       | Yes             | Yes             |
| MYPU_0060 | M. hominis P80-related membrane protein                               |             | 2157             | NA          | NA              |                 |
| MYPU_0070 | P60-like( <i>Mycoplasma hominis</i> ) lipoprotein                     |             | 1431             | NA          | Yes             |                 |
| MYPU_0080 | HIT-like protein (Cell cycle regulation)                              |             | 351              | MG132       | Yes             |                 |
| MYPU_0090 | Ribosomal protein L11                                                 | rplK        | 654              | MG081       | Yes             | Yes             |
| MYPU_0100 | Ribosomal protein L1                                                  | rplA        | 690              | MG082       | Yes             | Yes             |
| MYPU_0110 | Conserved hypothetical protein                                        |             | 1377             | NA          | NA              |                 |
| MYPU_0130 | tRNA modification GTPase TrmE                                         |             | 1329             | MG008       | Yes             |                 |
| MYPU_0230 | NADH oxidase                                                          | nox         | 1371             | MG275       | Yes             |                 |
| MYPU_0240 | Lipoprotein                                                           |             | 2532             | MG260       | No              |                 |
| MYPU_0250 | Lipoprotein (nuclease)                                                |             | 771              | MG186       | Yes             |                 |
| MYPU_0260 | ABC transporter ATP-binding protein                                   |             | 1803             | MG187       | Yes             |                 |
| MYPU_0270 | ABC transporter permease protein                                      |             | 1065             | MG188       | Yes             |                 |
| MYPU_0280 | ABC transporter permease protein                                      |             | 1005             | MG189       | Yes             |                 |
| MYPU_0340 | Seryl-tRNA synthetase                                                 | serS        | 1266             | MG005       | Yes             | Yes             |
| MYPU_0450 | Methionyl-tRNA formyltransferase                                      | fmt         | 870              | MG365       | Yes             | Yes             |
| MYPU_0460 | Glyceraldehyde 3-phosphate dehydrogenase                              | gap         | 1050             | MG301       | Yes             |                 |
| MYPU_0490 | DNA polymerase III subunits gamma and tau                             | dnaX (holB) | 2511             | MG419       | Yes             | Yes             |
| MYPU_0520 | Thymidylate kinase (dTMP kinase)                                      | tmk         | 705              | MG006       | Yes             | Yes             |
| MYPU_0530 | DNA polymerase III delta' subunit                                     | dnaH        | 894              | MG420       | Yes             | Yes             |
| MYPU_0870 | DNA-binding protein Hu                                                | hup         | 381              | MG353       | Yes             | Yes             |
| MYPU_0880 | GTP-binding protein EngA                                              | engA        | 1308             | MG329       | Yes             | Yes             |
| MYPU_0890 | Cytidylate kinase                                                     | cmk         | 672              | MG330       | Yes             | Yes             |
| MYPU_0930 | Leucyl-tRNA synthetase                                                | leuS        | 2424             | MG266       | Yes             | Yes             |
| MYPU_1030 | Oligo-1,6-glucosidase                                                 |             | 1635             | NA          | NA              |                 |
| MYPU_1040 | Preprotein translocase SecA subunit                                   | secA        | 2604             | MG072       | Yes             | Yes             |
| MYPU_1050 | Peptide chain release factor 1                                        | prfA        | 1080             | MG258       | Yes             | Yes             |
| MYPU_1060 | Protoporphirogen oxidase                                              | hemK        | 693              | MG259       | Yes             |                 |
| MYPU_1100 | Fructose-biphosphate aldolase                                         | fbaA        | 861              | MG023       | Yes             | Yes             |
| MYPU_1130 | Holo-[acyl-carrier protein] synthase                                  | acpS        | 327              | MG211.1     | Yes             | Yes             |
| MYPU_1140 | 1-acyl-sn-glycerol-3-phosphate acyltransferase                        | plsC        | 768              | MG212       | Yes             | Yes             |
| MYPU_1150 | Segregation and condensation protein A                                | scpA        | 747              | MG213       | No              | Yes             |
| MYPU_1160 | Segregation and condensation protein B                                | scpB        | 624              | MG214       | No              | Yes             |
| MYPU_1180 | O-sialoglycoprotein endopeptidase                                     | gcp         | 909              | MG046       | Yes             | Yes             |
| MYPU_1190 | Conserved hypothetical protein, similar to glycoprotein endopeptidase |             | 543              | MG208       | Yes             | Yes             |

|            |                                                            |      |      |         |     |     |
|------------|------------------------------------------------------------|------|------|---------|-----|-----|
| MYPYU_1200 | Conserved protein                                          |      |      | NA      | NA  | Yes |
| MYPYU_1240 | Glycerol-3-phosphate dehydrogenase                         | gpsA | 969  | NA      | NA  | Yes |
| MYPYU_1270 | Ribose-phosphate pyrophosphokinase                         | prs  | 966  | MG058   | Yes | Yes |
| MYPYU_1310 | Glucose-6-phosphate isomerase                              | pgiB | 1284 | MG111   | Yes |     |
| MYPYU_1330 | Hypothetical protein                                       |      | 1740 | NA      | NA  |     |
| MYPYU_1370 | Potassium uptake protein KtrA                              | ktrA | 714  | MG323   | Yes |     |
| MYPYU_1400 | Ribosomal protein L31                                      | rpmE | 210  | MG257   | Yes | Yes |
| MYPYU_1420 | Heat-inducible transcription repressor                     | hrcA | 1044 | MG205   | Yes |     |
| MYPYU_1430 | Co-chaperone GrpE                                          | grpE | 897  | MG201   | Yes | Yes |
| MYPYU_1440 | Potassium uptake protein KtrB                              | ktrB | 1572 | MG322   | Yes |     |
| MYPYU_1460 | Conserved hypothetical protein                             |      | 228  | MG335.1 | Yes |     |
| MYPYU_1470 | DNA gyrase subunit A                                       | gyrA | 2664 | MG004   | Yes | Yes |
| MYPYU_1490 | Hypothetical protein                                       |      | 1395 | NA      | NA  |     |
| MYPYU_1520 | Inner membrane protein translocase component<br>YidC       | yldC | 1827 | MG464   | Yes |     |
| MYPYU_1530 | Ribonuclease P protein component                           | rnpA | 336  | MG465   | Yes | Yes |
| MYPYU_1540 | Ribosomal protein L34                                      | rpmH | 147  | MG466   | Yes | Yes |
| MYPYU_1550 | Cation-transporting P-type ATPase                          | mgtA | 2790 | MG071   | Yes |     |
| MYPYU_1580 | Lipoprotein                                                |      | 1980 | NA      | NA  |     |
| MYPYU_1610 | Predicted kinase, related to dihydroxyacetone kinase       |      | 1638 | MG369   | Yes |     |
| MYPYU_1620 | Fatty acid/phospholipid synthesis protein                  | plsX | 978  | MG368   | Yes | Yes |
| MYPYU_1650 | GTPase translation factor, putative                        | ychF | 1110 | MG024   | No  |     |
| MYPYU_1680 | Phosphatidylglycerophosphate synthase                      | pgsA | 615  | MG114   | No  | Yes |
| MYPYU_1730 | Cysteine desulfurase                                       | csd  | 1164 | MG336   | Yes | Yes |
| MYPYU_1740 | IscU, NifU homolog involved in Fe-S cluster<br>formation   | iscU | 435  | MG337   | Yes | Yes |
| MYPYU_1760 | Conserved protein                                          |      | 1878 | NA      | NA  |     |
| MYPYU_1770 | Cysteinyl-tRNA synthetase                                  | cysS | 1791 | MG253   | Yes | Yes |
| MYPYU_1800 | Ribosomal protein L3s                                      | rpmG | 141  | MG325   | Yes | Yes |
| MYPYU_1820 | Transcription antitermination protein NusG                 | nusG | 591  | MG054   | Yes | Yes |
| MYPYU_1830 | Prolyl-tRNA synthetase                                     | proS | 1506 | MG283   | Yes | Yes |
| MYPYU_1840 | Thioredoxin                                                | trxA | 378  | MG124   | Yes | Yes |
| MYPYU_1990 | Glutamyl-tRNA amidotransferase subunit C                   | gatC | 306  | MG098   | Yes | Yes |
| MYPYU_2000 | Glutamyl-tRNA amidotransferase subunit A                   | gatA | 1347 | MG099   | Yes | Yes |
| MYPYU_2010 | Aspartyl/glutamyl-tRNA amidotransferase<br>subunit B       | gatB | 1485 | MG100   | Yes | Yes |
| MYPYU_2030 | Transcription elongation factor NusA                       | nusA | 1653 | MG141   | Yes | Yes |
| MYPYU_2050 | Translation initiation factor IF-2                         | infB | 1812 | MG142   | Yes | Yes |
| MYPYU_2190 | Ribosome recycling factor                                  | frr  | 564  | MG435   | Yes | Yes |
| MYPYU_2200 | Uridylate kinase                                           | pyrH | 732  | MG434   | Yes |     |
| MYPYU_2230 | Molecular chaperone DnaK                                   |      | 1800 | MG305   | Yes |     |
| MYPYU_2240 | Phosphonate ABC transporter, ATP-binding protein, putative |      | 741  | MG290   | No  |     |

|            |                                                                                       |      |      |       |     |     |
|------------|---------------------------------------------------------------------------------------|------|------|-------|-----|-----|
| MYPUP_2250 | Phosphonate ABC transporter, substrate binding protein (P37), putative                |      | 1239 | MG289 | No  |     |
| MYPUP_2310 | Hypothetical protein                                                                  |      | 1149 | NA    | NA  |     |
| MYPUP_2330 | Hypothetical protein                                                                  |      | 2391 | NA    | NA  |     |
| MYPUP_2350 | ATP synthase alpha chain                                                              | atpA | 1590 | NA    | NA  |     |
| MYPUP_2370 | Phosphate acetyltransferase                                                           | pta  | 957  | MG299 | Yes |     |
| MYPUP_2380 | Acetate kinase                                                                        | ackA | 1182 | MG357 | Yes |     |
| MYPUP_2390 | GTPase protein YihA (EngB)                                                            | ysxC | 561  | MG335 | Yes | Yes |
| MYPUP_2400 | Pyruvate kinase                                                                       | pyk  | 1428 | MG216 | Yes |     |
| MYPUP_2430 | Arginyl-tRNA synthetase                                                               | argS | 1605 | MG378 | Yes | Yes |
| MYPUP_2440 | COF family HAD hydrolase protein, conserved                                           |      | 813  | MG265 | Yes |     |
| MYPUP_2460 | Phosphoglycerate kinase                                                               | pgk  | 2316 | MG300 | Yes | Yes |
| MYPUP_2510 | Hypothetical protein                                                                  |      | 1146 | NA    | NA  |     |
| MYPUP_2530 | Glucose-inhibited division protein A                                                  | gidA | 1836 | MG379 | Yes |     |
| MYPUP_2560 | Hypothetical protein                                                                  |      | 2364 | NA    | NA  |     |
| MYPUP_2570 | Valyl-tRNA synthetase                                                                 | valS | 2484 | MG334 | Yes | Yes |
| MYPUP_2580 | Methylenetetrahydrofolate dehydrogenase/methylenetetrahydrofolate cyclohydrolase      | folD | 819  | MG013 | Yes | Yes |
| MYPUP_2590 | Translation initiation factor IF-3                                                    | infC | 711  | MG196 | Yes | Yes |
| MYPUP_2600 | Ribosomal protein L35                                                                 | rpmI | 195  | MG197 | Yes | Yes |
| MYPUP_2610 | Ribosomal protein L20                                                                 | rplT | 351  | MG198 | Yes | Yes |
| MYPUP_2660 | ATP synthase subunit B                                                                | atpD | 1428 | MG399 | Yes | Yes |
| MYPUP_2670 | ATP synthase subunit C                                                                | atpG | 840  | MG400 | Yes | Yes |
| MYPUP_2680 | ATP synthase subunit A                                                                | atpA | 1587 | MG401 | Yes |     |
| MYPUP_2690 | ATP synthase delta chain                                                              | atpH | 540  | MG402 | Yes |     |
| MYPUP_2700 | ATP synthase B chain                                                                  | atpF | 543  | MG403 | Yes |     |
| MYPUP_2710 | ATP synthase C chain                                                                  | atpE | 279  | MG404 | Yes |     |
| MYPUP_2720 | ATP synthase A chain                                                                  | atpB | 813  | MG405 | Yes |     |
| MYPUP_2770 | Phosphopentomutase                                                                    | deoB | 1185 | NA    | NA  |     |
| MYPUP_2820 | Lipoprotein                                                                           |      | 2631 | NA    | NA  |     |
| MYPUP_2830 | Oligopeptide ABC transporter, permease protein (OppB)                                 | oppB | 1059 | MG077 | Yes |     |
| MYPUP_2840 | Oligopeptide ABC transporter, permease protein (OppC)                                 | oppC | 1155 | MG078 | Yes |     |
| MYPUP_2850 | Oligopeptide ABC transporter, ATP-binding protein                                     | oppD | 1104 | MG079 | Yes |     |
| MYPUP_2890 | Ribosomal protein L7/L12                                                              | rplL | 369  | MG362 | Yes | Yes |
| MYPUP_2900 | Ribosomal protein L10                                                                 | rplJ | 561  | MG361 | Yes | Yes |
| MYPUP_2930 | Conserved hypothetical protein, putative Na <sup>+</sup> driven multidrug efflux pump |      | 1560 | NA    | NA  |     |
| MYPUP_2950 | Conserved hypothetical membrane protein                                               |      | 675  | MG247 | Yes | Yes |
| MYPUP_2980 | Pseudouridine synthase                                                                | rluD | 891  | MG209 | Yes |     |
| MYPUP_3000 | Ribonuclease HIII                                                                     | rnhC | 732  | MG199 | Yes |     |
| MYPUP_3010 | COF family HAD hydrolase protein                                                      |      | 924  | MG265 | Yes |     |

|            |                                                             |      |      |         |     |     |
|------------|-------------------------------------------------------------|------|------|---------|-----|-----|
| MYPYU_3030 | SpoU class tRNA/rRNA methyltransferase                      |      | 525  | MG346   | No  | Yes |
| MYPYU_3050 | Conserved hypothetical protein                              |      | 294  | MG211   | Yes |     |
| MYPYU_3060 | GTPase protein YlqF                                         | ylqF | 876  | MG442   | Yes | Yes |
| MYPYU_3100 | Formamidopyrimidine-DNA glycosylase MutM                    | fpg  | 837  | MG262.1 | Yes |     |
| MYPYU_3120 | Acyl carrier protein phosphodiesterase                      | acpD | 597  | MG333   | Yes | Yes |
| MYPYU_3130 | Hypothetical protein, possible esterase or lipase           |      | 8460 | NA      | NA  |     |
| MYPYU_3140 | Deoxyribose-phosphate aldolase                              | deoC | 690  | MG050   | Yes |     |
| MYPYU_3150 | Uracil phosphoribosyltransferase                            | upp  | 627  | MG030   | Yes |     |
| MYPYU_3220 | Adenine phosphoribosyltransferase                           | apt  | 513  | MG276   | Yes |     |
| MYPYU_3230 | Lipoprotein                                                 |      | 1896 | NA      | NA  |     |
| MYPYU_3240 | Ribosomal protein L32                                       | rpmF | 186  | MG363   | Yes | Yes |
| MYPYU_3280 | Ribosomal protein S15                                       | rpsO | 267  | MG424   | Yes | Yes |
| MYPYU_3290 | Ribosomal protein L27                                       | rpmA | 258  | MG234   | Yes | Yes |
| MYPYU_3300 | Ribosomal protein L21                                       | rplU | 396  | MG232   | Yes | Yes |
| MYPYU_3320 | Aspartyl-tRNA synthetase                                    | aspS | 1737 | MG036   | Yes | Yes |
| MYPYU_3330 | Histidyl-tRNA synthetase                                    | hisS | 1263 | MG035   | Yes | Yes |
| MYPYU_3350 | Nicotinamide-nucleotide adenylyltransferase                 | nadD | 1101 | MG240   | Yes | Yes |
| MYPYU_3390 | Serine hydroxymethyltransferase                             | glyA | 1242 | MG394   | Yes | Yes |
| MYPYU_3420 | Signal recognition particle protein                         | ffh  | 1350 | MG048   | Yes | Yes |
| MYPYU_3470 | Phenylalanyl-tRNA synthetase, beta subunit                  | pheT | 2157 | MG195   | Yes | Yes |
| MYPYU_3480 | Phenylalanyl-tRNA synthetase, alpha subunit                 | pheS | 945  | MG194   | Yes | Yes |
| MYPYU_3520 | SsrA-binding protein                                        | smpB | 438  | MG059   | Yes | Yes |
| MYPYU_3530 | GTPase protein Obg                                          | obg  | 1257 | MG384   | Yes | Yes |
| MYPYU_3580 | Acyl carrier protein                                        | acpA | 222  | MG287   | Yes | Yes |
| MYPYU_3590 | DegV family protein                                         |      | 867  | MG326   | Yes |     |
| MYPYU_3610 | PTS system, N-acetylglucosamine-specific<br>IIABC component | nagE | 1578 | NA      | NA  |     |
| MYPYU_3640 | PTS system, glucose-specific IIABC component                | ptsG | 1809 | MG069   | Yes |     |
| MYPYU_3720 | DNA topoisomerase IV subunit B                              | parE | 1929 | MG203   | Yes | Yes |
| MYPYU_3730 | DNA topoisomerase IV subunit A                              | parC | 2820 | MG204   | Yes | Yes |
| MYPYU_3740 | Lipoprotein                                                 |      | 1449 | NA      | NA  | Yes |
| MYPYU_3800 | GTP-binding protein Era                                     | era  | 882  | MG387   | Yes | Yes |
| MYPYU_3860 | Metal ion ABC transporter, ATP-binding protein,<br>putative | cbiO | 798  | MG179   | Yes |     |
| MYPYU_3870 | Metal ion ABC transporter ATP-binding protein,<br>putative  | cbiO | 915  | MG180   | Yes |     |
| MYPYU_3880 | Metal ion ABC transporter, permease protein                 | cbiQ | 891  | MG181   | Yes |     |
| MYPYU_3890 | DNA ligase, NAD-dependent                                   | ligA | 2040 | MG254   | Yes | Yes |
| MYPYU_4010 | DNA ligase, NAD-dependent                                   | ligA | 1104 | NA      | NA  |     |
| MYPYU_4050 | Elongation factor Tu                                        | tufA | 1191 | MG451   | Yes | Yes |
| MYPYU_4060 | Conserved hypothetical protein                              | ymdA | 1338 | NA      | NA  | Yes |
| MYPYU_4070 | Conserved hypothetical protein                              |      | 627  | MG105   | Yes |     |

|            |                                                                 |             |      |       |     |     |
|------------|-----------------------------------------------------------------|-------------|------|-------|-----|-----|
| MYPYU_4080 | Mg <sup>2+</sup> transport protein (MgtE)                       |             | 1458 | NA    | NA  |     |
| MYPYU_4100 | Oligopeptide ABC transporter, permease protein                  | oppB        | 1107 | NA    | NA  |     |
| MYPYU_4210 | Potassium channel protein                                       |             | 1035 | NA    | NA  |     |
| MYPYU_4220 | Spermidine/putrescine ABC transporter substrate binding protein | potD        | 1719 | MG045 | Yes |     |
| MYPYU_4230 | Spermidine/putrescine ABC transporter permease protein PotC     | potC        | 894  | MG044 | Yes |     |
| MYPYU_4240 | Spermidine/putrescine ABC transporter permease protein PotB     | potB        | 840  | MG043 | Yes |     |
| MYPYU_4250 | Spermidine/putrescine ABC transporter ATP-binding protein PotA  | potA        | 1377 | MG042 | Yes |     |
| MYPYU_4280 | Elongation factor EF-2                                          | fusA        | 2088 | MG089 | Yes | Yes |
| MYPYU_4290 | Ribosomal protein S7                                            | rpsG        | 471  | MG088 | Yes | Yes |
| MYPYU_4300 | Ribosomal protein S12                                           | rpsL        | 414  | MG087 | Yes | Yes |
| MYPYU_4440 | Hypothetical protein                                            |             | 1527 | NA    | NA  |     |
| MYPYU_4480 | Hypothetical protein                                            |             | 2739 | NA    | NA  |     |
| MYPYU_4490 | ATP synthase subunit A                                          |             | 1542 | NA    | NA  |     |
| MYPYU_4510 | Glycyl-tRNA synthetase                                          | glyS        | 1362 | MG251 | Yes | Yes |
| MYPYU_4530 | DNA primase                                                     | dnaG        | 1809 | MG250 | Yes | Yes |
| MYPYU_4540 | RNA polymerase sigma factor                                     | rpoD (sigA) | 1386 | MG249 | Yes | Yes |
| MYPYU_4580 | Triosephosphate isomerase                                       | tpiA        | 747  | MG431 | Yes | Yes |
| MYPYU_4590 | Phosphoglyceromutase                                            | pgm         | 1518 | MG430 | Yes | Yes |
| MYPYU_4620 | DNA polymerase III delta subunit                                | holA        | 942  | NA    | NA  | Yes |
| MYPYU_4670 | Ribosomal protein L19                                           | rplS        | 354  | MG444 | Yes | Yes |
| MYPYU_4680 | tRNA (guanine-N1)-methyltransferase                             | trmD        | 678  | MG445 | Yes | Yes |
| MYPYU_4690 | Ribosomal protein S16                                           | rpsP        | 267  | MG446 | Yes | Yes |
| MYPYU_4700 | Inorganic pyrophosphatase                                       | ppa         | 552  | MG351 | Yes | Yes |
| MYPYU_4710 | DNA topoisomerase I                                             | topA        | 1878 | MG122 | Yes | Yes |
| MYPYU_4740 | Phosphatidate cytidylyltransferase                              | cdsA        | 969  | MG437 | No  | Yes |
| MYPYU_4760 | Conserved hypothetical protein                                  |             | 1683 | MG366 | Yes |     |
| MYPYU_4770 | Conserved hypothetical protein                                  |             | 852  | MG373 | Yes |     |
| MYPYU_4830 | Nicotinate phosphoribosyltransferase                            |             | 1005 | NA    | NA  | Yes |
| MYPYU_4840 | Conserved hypothetical protein                                  |             | 2736 | NA    | NA  |     |
| MYPYU_4850 | Tyrosyl-tRNA synthetase                                         | tyrS        | 1245 | MG455 | Yes | Yes |
| MYPYU_4860 | Phenylalanyl-tRNA synthetase, beta subunit                      | pheT        | 591  | MG195 | Yes | Yes |
| MYPYU_4880 | Aminopeptidase                                                  | pepP        | 1047 | MG324 | Yes |     |
| MYPYU_4900 | Methionyl-tRNA synthetase                                       | metS        | 1530 | MG021 | Yes | Yes |
| MYPYU_4910 | Cell division protein FtsZ                                      | ftsZ        | 1173 | MG224 | Yes | Yes |
| MYPYU_4920 | Hypothetical protein                                            |             | 1233 | NA    | NA  |     |
| MYPYU_4930 | S-adenosyl-methyltransferase                                    |             | 900  | MG222 | Yes |     |
| MYPYU_4940 | Protein MraZ                                                    |             | 465  | MG221 | Yes |     |
| MYPYU_4950 | Ribosomal protein L13                                           | rplM        | 435  | MG418 | Yes | Yes |
| MYPYU_4960 | Ribosomal protein S9                                            | rpsI        | 411  | MG417 | Yes | Yes |

|            |                                                              |               |      |         |     |     |
|------------|--------------------------------------------------------------|---------------|------|---------|-----|-----|
| MYPYU_5060 | Methionine sulfoxide reductase B                             | msrB          | 438  | MG448   | Yes |     |
| MYPYU_5110 | Transketolase                                                | tktA          | 1848 | MG066   | No  | Yes |
| MYPYU_5130 | Elongation factor P                                          | efp           | 564  | MG026   | Yes |     |
| MYPYU_5140 | Conserved hypothetical protein, possible hemolysin           |               | 1290 | MG146   | Yes |     |
| MYPYU_5150 | Replicative DNA helicase                                     | dnaC          | 1368 | MG094   | Yes | Yes |
| MYPYU_5160 | Ribosomal protein L9                                         | rplI          | 471  | MG093   | Yes | Yes |
| MYPYU_5170 | Conserved hypothetical protein                               |               | 1983 | NA      | NA  |     |
| MYPYU_5180 | Enolase                                                      | eno           | 1371 | MG407   | Yes | Yes |
| MYPYU_5190 | Heat shock ATP-dependent protease La                         | lon           | 2529 | MG239   | Yes |     |
| MYPYU_5320 | Elongation factor Ts                                         | tsf           | 885  | MG433   | Yes | Yes |
| MYPYU_5330 | Ribosomal protein S2                                         | rpsB          | 993  | MG070   | Yes | Yes |
| MYPYU_5370 | Dihydrofolate reductase                                      | dhfr          | 540  | MG228   | Yes | Yes |
| MYPYU_5400 | Ribonucleoprotein NrdI                                       | nrdI          | 456  | MG230   | Yes | Yes |
| MYPYU_5450 | DNA-directed RNA polymerase beta' subunit                    | rpoC          | 4281 | MG340   | Yes | Yes |
| MYPYU_5460 | DNA-directed RNA polymerase beta subunit                     | rpoB          | 3651 | MG341   | Yes | Yes |
| MYPYU_5480 | Riboflavin kinase/FAD synthetase                             | ribF          | 840  | MG145   | Yes |     |
| MYPYU_5490 | COF family HAD hydrolase protein                             |               | 828  | MG265   | Yes |     |
| MYPYU_5510 | Hypoxanthine-guanine phosphoribosyltransferase               | hpt<br>(hprT) | 582  | MG458   | Yes | Yes |
| MYPYU_5530 | Transcription elongation factor GreA                         | greA          | 495  | MG282   | Yes |     |
| MYPYU_5560 | Holliday junction resolvase, putative                        |               | 441  | MG291.1 | Yes |     |
| MYPYU_5570 | Alanyl-tRNA synthetase                                       | alaS          | 2622 | MG292   | Yes | Yes |
| MYPYU_5580 | tRNA (5-methylaminomethyl-2-thiouridylate)-methyltransferase | trmU          | 1116 | MG295   | Yes | Yes |
| MYPYU_5600 | Ribosomal protein L17                                        | rplQ          | 363  | MG178   | Yes | Yes |
| MYPYU_5610 | DNA-directed RNA polymerase alpha subunit                    | rpoA          | 1002 | MG177   | Yes | Yes |
| MYPYU_5620 | Ribosomal protein S11                                        | rpsK          | 411  | MG176   | Yes | Yes |
| MYPYU_5630 | Ribosomal protein S13                                        | rpsM          | 399  | MG175   | Yes | Yes |
| MYPYU_5640 | Ribosomal protein L36                                        | rplJ          | 114  | MG174   | Yes | Yes |
| MYPYU_5650 | Translation initiation factor IF-1                           | infA          | 219  | MG173   | Yes | Yes |
| MYPYU_5660 | Methionine aminopeptidase                                    | map           | 750  | MG172   | Yes | Yes |
| MYPYU_5670 | Adenylate kinase                                             | adk           | 645  | MG171   | Yes | Yes |
| MYPYU_5680 | Preprotein translocase SecY                                  | secY          | 1425 | MG170   | Yes | Yes |
| MYPYU_5690 | Ribosomal protein L15                                        | rplO          | 438  | MG169   | Yes | Yes |
| MYPYU_5700 | Ribosomal protein S5                                         | rpsE          | 690  | MG168   | Yes | Yes |
| MYPYU_5710 | Ribosomal protein L18                                        | rplR          | 357  | MG167   | Yes | Yes |
| MYPYU_5720 | Ribosomal protein L6                                         | rplF          | 540  | MG166   | Yes | Yes |
| MYPYU_5730 | Ribosomal protein S8                                         | rpsH          | 399  | MG165   | Yes | Yes |
| MYPYU_5740 | Ribosomal protein S14                                        | rpsN          | 186  | MG164   | Yes | Yes |
| MYPYU_5750 | Ribosomal protein L5                                         | rplE          | 546  | MG163   | Yes | Yes |
| MYPYU_5760 | Ribosomal protein L24                                        | rplX          | 327  | MG162   | Yes | Yes |

|           |                                                                      |      |      |         |     |     |
|-----------|----------------------------------------------------------------------|------|------|---------|-----|-----|
| MYPU_5770 | Ribosomal protein L14                                                | rplN | 396  | MG161   | Yes | Yes |
| MYPU_5780 | Ribosomal protein S17                                                | rpsQ | 267  | MG160   | Yes | Yes |
| MYPU_5790 | Ribosomal protein L29                                                | rmpC | 198  | MG159   | Yes | Yes |
| MYPU_5800 | Ribosomal protein L16                                                | rplP | 429  | MG158   | Yes | Yes |
| MYPU_5810 | Ribosomal protein S3                                                 | rpsC | 654  | MG157   | Yes | Yes |
| MYPU_5830 | Ribosomal protein L22                                                | rplV | 333  | MG156   | Yes | Yes |
| MYPU_5840 | Ribosomal protein S19                                                | rpsS | 276  | MG155   | Yes | Yes |
| MYPU_5850 | Ribosomal protein L2                                                 | rplB | 846  | MG154   | Yes | Yes |
| MYPU_5860 | Ribosomal protein L23                                                | rplW | 465  | MG153   | Yes | Yes |
| MYPU_5870 | Ribosomal protein L4                                                 | rplD | 879  | MG152   | Yes | Yes |
| MYPU_5890 | Ribosomal protein L3                                                 | rplC | 801  | MG151   | Yes | Yes |
| MYPU_5900 | Ribosomal protein S10                                                | rpsJ | 312  | MG150   | Yes | Yes |
| MYPU_6010 | 6-phosphofruktokinase                                                | pfkA | 981  | MG215   | Yes | Yes |
| MYPU_6020 | Phosphoenolpyruvate-protein phosphotransferase                       | ptsI | 1710 | MG429   | Yes |     |
| MYPU_6030 | Phosphocarrier protein HPr                                           | ptsH | 264  | MG041   | Yes | Yes |
| MYPU_6100 | Single-strand DNA binding protein                                    | ssb  | 546  | MG091   | Yes | Yes |
| MYPU_6110 | Ribosomal protein S6                                                 | rbsF | 453  | MG090   | Yes | Yes |
| MYPU_6120 | Ribose-5-phosphate isomerase B                                       | rpiB | 468  | MG396   | Yes |     |
| MYPU_6130 | Conserved protein                                                    |      | 462  | NA      | NA  | Yes |
| MYPU_6210 | Endonuclease IV                                                      | nfo  | 834  | MG235   | Yes |     |
| MYPU_6230 | NH(3)-dependent NAD(+) synthase                                      | nadE | 774  | MG383   | Yes | Yes |
| MYPU_6330 | Oligo-1,6-glucosidase                                                |      | 1635 | NA      | NA  |     |
| MYPU_6450 | Purine nucleoside phosphorylase                                      | deoD | 699  | MG049   | Yes |     |
| MYPU_6560 | Ribosomal protein S20                                                | rpsT | 333  | MG363.1 | Yes | Yes |
| MYPU_6590 | Protein-export membrane protein SecD                                 | secD | 2622 | NA      | NA  |     |
| MYPU_6650 | Cardiolipin synthetase                                               | cls  | 1506 | NA      | NA  |     |
| MYPU_6660 | CTP synthetase                                                       | pyrG | 1620 | NA      | NA  | Yes |
| MYPU_6670 | Isoleucyl-tRNA synthetase                                            |      | 2667 | MG345   | Yes | Yes |
| MYPU_6680 | Lipoprotein signal peptidase (signal peptidase II)                   | lspA | 831  | MG210   | No  |     |
| MYPU_6690 | Hypothetical protein, likely surface protein                         |      | 1983 | NA      | NA  |     |
| MYPU_6700 | Conserved hypothetical protein                                       |      | 1944 | MG414   | No  |     |
| MYPU_6710 | Conserved hypothetical protein, possible Ser/Thr protein phosphatase |      | 813  | MG246   | Yes |     |
| MYPU_6720 | Ribosome-binding factor A                                            |      | 339  | MG143   | Yes |     |
| MYPU_6740 | Cell division protein FtsY                                           | ftsY | 1122 | MG297   | Yes | Yes |
| MYPU_6750 | DNA polymerase III subunit alpha                                     | polC | 4308 | MG031   | Yes | Yes |
| MYPU_6820 | Glutamyl-tRNA synthetase                                             | gltX | 1407 | MG462   | Yes | Yes |
| MYPU_6850 | Serine/threonine-protein kinase PknB                                 | pknB | 963  | MG109   | Yes |     |
| MYPU_6860 | Protein phosphatase                                                  |      | 738  | MG108   | Yes |     |
| MYPU_6870 | Guanylate kinase                                                     | gmk  | 591  | MG107   | Yes | Yes |
| MYPU_6890 | Peptide deformylase                                                  | def  | 597  | MG106   | Yes |     |

|            |                                                                                       |             |      |         |         |     |
|------------|---------------------------------------------------------------------------------------|-------------|------|---------|---------|-----|
| MYPYU_6900 | ABC transporter ATP-binding protein                                                   |             | 1614 | NA      | NA      |     |
| MYPYU_6920 | Phosphoesterase, DHH subfamily 1                                                      |             | 975  | MG190   | Yes     |     |
| MYPYU_6990 | ATP synthase subunit B                                                                |             | 1407 | MG399   | Yes     |     |
| MYPYU_7020 | S-adenosylmethionine synthetase                                                       | metK        | 1131 | MG047   | Yes     | Yes |
| MYPYU_7040 | Metallo-beta-lactamase superfamily protein                                            |             | 1896 | MG139   | Yes     | Yes |
| MYPYU_7050 | Hydrolase, metallo-beta-lactamase superfamily                                         |             | 1641 | MG423   | Yes     |     |
| MYPYU_7070 | Thioredoxin                                                                           | trxA        | 330  | MG124   | Yes     | Yes |
| MYPYU_7090 | Conserved hypothetical protein, possibly related to phosphomannomutase                |             | 1536 | NA      | NA      |     |
| MYPYU_7110 | HPr kinase/phosphorylase                                                              | hprK        | 930  | MG085   | Yes     |     |
| MYPYU_7120 | Prolipoprotein diacylglyceryl transferase                                             | lgt         | 969  | MG086   | Yes     |     |
| MYPYU_7130 | Thioredoxin reductase                                                                 | trxB        | 924  | MG102   | Yes     | Yes |
| MYPYU_7140 | Chromosome segregation ATPase Smc                                                     | smc         | 2940 | MG298   | No      | Yes |
| MYPYU_7160 | Ribosomal protein S4                                                                  | rpsD        | 600  | MG311   | Yes     | Yes |
| MYPYU_7170 | Hypothetical protein                                                                  |             | 1665 | NA      | NA      |     |
| MYPYU_7180 | Thiamine biosynthesis/tRNA modification protein                                       | thiI        | 1140 | MG372   | Yes     |     |
| MYPYU_7190 | DNA polymerase III subunit alpha                                                      | dnaE        | 2946 | MG261   | Yes     | Yes |
| MYPYU_7200 | 5'-3' exonuclease, exo domain of DNA polymerase I                                     |             | 894  | MG262   | Yes     |     |
| MYPYU_7220 | Chromosome replication initiation and membrane attachment protein                     | dnaB        | 945  | NA      | NA      | Yes |
| MYPYU_7240 | Hypothetical protein                                                                  |             | 1326 | NA      | NA      |     |
| MYPYU_7260 | Aminopeptidase (leucine aminopeptidase)                                               | pepA        | 1365 | MG391   | Yes     |     |
| MYPYU_7330 | Heat shock protein DnaJ                                                               | dnaJ        | 1152 | MG019   | Yes     |     |
| MYPYU_7380 | Conserved hypothetical protein, putative Na <sup>+</sup> driven multidrug efflux pump |             | 1497 | NA      | NA      |     |
| MYPYU_7390 | DNA gyrase subunit B                                                                  | gyrB        | 1935 | MG003   | Yes     | Yes |
| MYPYU_7430 | Conserved hypothetical protein                                                        |             | 1482 | NA      | NA      |     |
| MYPYU_7450 | Tryptophanyl-tRNA synthetase                                                          | trpS        | 999  | MG126   | Yes     | Yes |
| MYPYU_7460 | Threonyl-tRNA synthetase                                                              | thrS        | 1770 | MG375   | Yes     |     |
| MYPYU_7610 | Dihydroliipoamide dehydrogenase                                                       | pdhD        | 1884 | MG271   | No      |     |
| MYPYU_7620 | Dihydroliipoamide acetyltransferase                                                   | pdhC        | 948  | MG272   | Yes     | Yes |
| MYPYU_7640 | Pyruvate dehydrogenase component E1, alpha subunit                                    | pdhA        | 1107 | MG274   | Yes     | Yes |
| MYPYU_7660 | Conserved hypothetical protein, degV family member                                    |             | 849  | MG326   | Yes     |     |
| MYPYU_7670 | Hypothetical protein                                                                  |             | 1599 | NA      | NA      |     |
| MYPYU_7680 | ATP-dependent helicase PcrA                                                           | pcrA (uvrD) | 2184 | MG244   | No      | Yes |
| MYPYU_7700 | Glycosyltransferase                                                                   |             | 1011 | MG335.2 | Yes     |     |
| MYPYU_7710 | Asparaginyl-tRNA synthetase                                                           | asnS        | 1353 | MG113   | Yes     | Yes |
| MYPYU_7730 | ABC transporter ATP-binding protein                                                   |             | 906  | MG065   | Yes     |     |
| MYPYU_7740 | ABC transporter permease protein                                                      |             | 7800 | MG064   | Yes     |     |
| MYPYU_7790 | Cell division protein FtsH                                                            | ftsH        | 2178 | MG457   | Yes     |     |
| MYPYU_7800 | PP-loop superfamily ATPase/cell cycle protein                                         | mesJ        | 861  | MG084   | Unknown | Yes |



|           |                                    |                |      |       |     |     |
|-----------|------------------------------------|----------------|------|-------|-----|-----|
| MYPU_7810 | Peptidyl-tRNA hydrolase            | pth<br>(spoVC) | 561  | MG083 | Yes | Yes |
| MYPU_7820 | Exodeoxyribonuclease V alpha chain | recD           | 2085 | NA    | NA  |     |

---

<sup>a</sup>Essential genes in *M. genitalium* (Mg) and *B. subtilis* (Bs) are as reported by Glass et al. and Kobayashi et al. (Glass *et al.*, 2006; Kobayashi *et al.*, 2003).
